# Supplementary material for: CO2-switchable poly (N-isopropylacrylamide) microgel-based etalons
Source: Royal Society of Chemistry journal article supplement (doi:10.1039/c4tc02600d), 2014-12-10
Supplement: c4tc02600d1.pdf [file c4tc02600d1.pdf]

## **CO<sub>2</sub>-Switchable Poly (*N*-Isopropylacrylamide) Microgel-Based Etalons**

Qiang Matthew Zhang, Andrews Ahiabu, Yongfeng Gao, Michael J. Serpe\*

Department of Chemistry, University of Alberta, Edmonton, Alberta, Canada T6G 2G2

E-mail: michael.serpe@ualberta.ca; Fax: +1 780 492 8231; Tel: +1 780 492 5778.

## **Experimental Details.**

TEM images were obtained on an ultrahigh-resolution transmission electron microscope (JEOLJEM-2010FEF) using an accelerating voltage of 200 kV. DLS measurements were carried out by using a DLS/SLS-5000 compact goniometer (ALV, Langen) coupled with an ALV photon correlator.

## **Microgel synthesis.**

A 3-necked round bottom flask was fitted with a reflux condenser, nitrogen inlet, and temperature probe, and charged with a solution of N-isopropylacrylamide (11.9 mmol), a certain amount of 4-vinyl pyridine (depending on the specific concentration desired), and BIS (0.6 mmol) in 99 mL deionized water, previously filtered through a 0.2 mm filter. The solution was purged with N<sub>2</sub> and allowed to heat to 70 °C over ~1 hour. The reaction was then initiated with a solution of ammonium persulfate (0.2 mmol) in 1 mL of deionized water. The reaction proceeded at 70 °C for 4 hours under a blanket of nitrogen. The resulting suspension was allowed to cool overnight while stirring, and then it was filtered through a Whatman #1 paper filter to remove any large aggregates. The microgel solution was then distributed into centrifuge tubes and purified via centrifugation at ~8300 rcf to form a pellet, followed by removal of the supernatant and resuspension with deionized water, 6 times. The cleaned microgels were recombined and stored in a brown glass jar.

## **Preparation of etalons**

To fabricate the Au coated coverslips (etalon underlayer), 2 nm Cr and 15 nm of Au was added to a 25 x 25 mm ethanol rinsed and N<sub>2</sub> gas dried glass coverslip (Fisher's Finest, Ottawa, ON) at

a rate of  $1 \text{ \AA s}^{-1}$ , and  $0.1 \text{ \AA s}^{-1}$ , respectively (Torr International Inc., thermal evaporation system, Model THEUPG, New Windsor, NY). The Cr/Au substrates were annealed at  $250 \text{ }^\circ\text{C}$  for 3 h (Thermolyne muffle furnace, Ottawa, ON) and cooled to room temperature prior to microgel film deposition.

Approximately 5-10 mL of microgel solution was centrifuged at  $\sim 8300$  rcf to form a pellet. The supernatant was removed and discarded, and the pellet was vortexed to loosen and homogenize the particles in the remaining solvent. A  $40 \text{ }\mu\text{L}$  aliquot of concentrated microgels was spread onto an annealed  $25 \text{ mm} \times 25 \text{ mm}$  Au-coated glass coverslip. The film was allowed to dry on a  $30 \text{ }^\circ\text{C}$  hotplate for 30 minutes before the excess microgels not bound directly to the Au layer were rinsed away with deionized water. The samples were then soaked overnight at  $30 \text{ }^\circ\text{C}$  in a deionized water bath. The samples were then rinsed with deionized water, dried with  $\text{N}_2$ , and another Au overlayer (2 nm Cr for adhesion, followed by 15 nm Au) was added. The completed device was soaked overnight in deionized water at  $30 \text{ }^\circ\text{C}$  before spectral analysis.

### **Reflectance spectroscopy**

Reflectance measurements were conducted in a specially designed sample holder using a USB2000+ spectrophotometer, a HL-2000-FHSA tungsten light source, and a R400-7-VISNIR optical fiber reflectance probe, all from Ocean Optics (Dunedin, FL). The spectra were recorded using Ocean Optics Spectra Suite Spectroscopy Software over a wavelength range of 350–1,025 nm. Measurements were performed in the sample holder, which allows for careful sample positioning, sample stability, and fine temperature control. Dry ice was used as the  $\text{CO}_2$  gas source, and  $\text{CO}_2$  gas was bubbled into solution during the test process. The light source was always positioned over the center of the etalon.

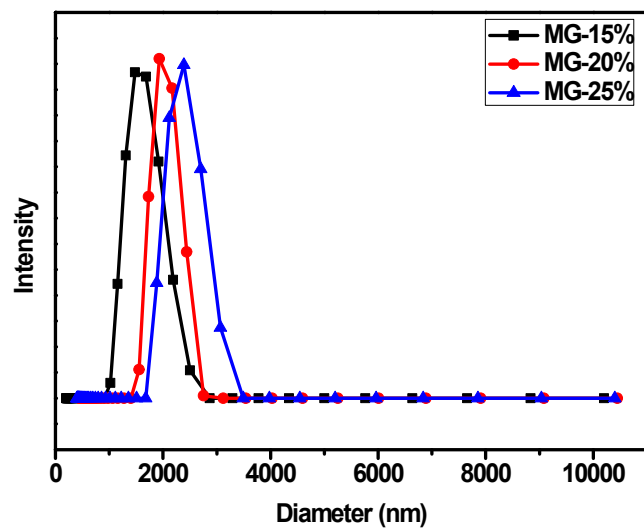

**Figure S1.** Microgel diameter at 30 °C determined by dynamic light scattering (DLS).

(a)

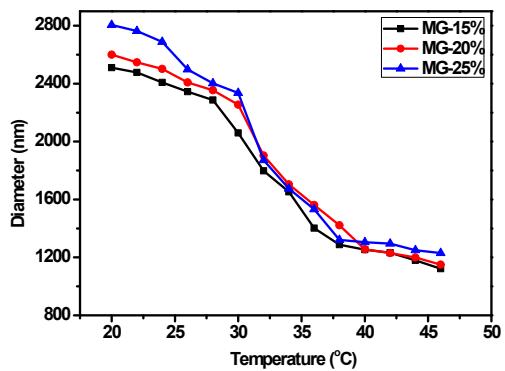

(b)

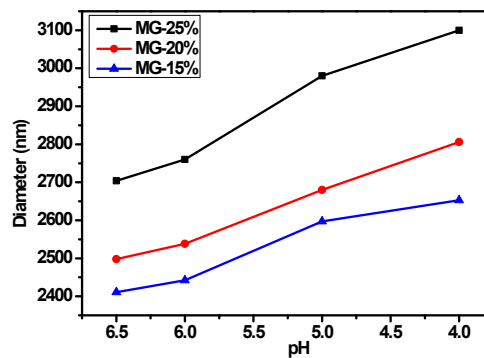

**Figure S2.** (a) DLS measured microgel diameters at pH = 6.5 as a function of temperature; (b) DLS measured microgel diameters as a function of pH at 22 °C.

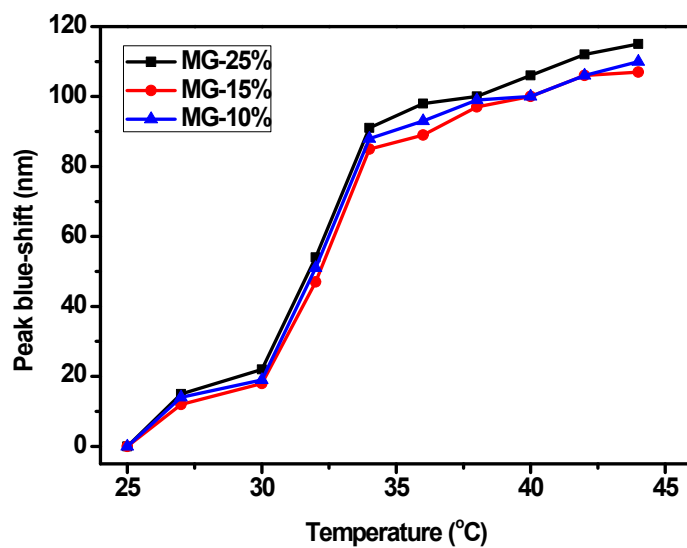

**Figure S3.**  $\lambda_5$  peak blue-shift for the indicated microgel-based etalons as a function of temperature. Peak blue-shift was calculated by  $\lambda_5(T) - \lambda_5(25\text{ }^\circ\text{C})$ .

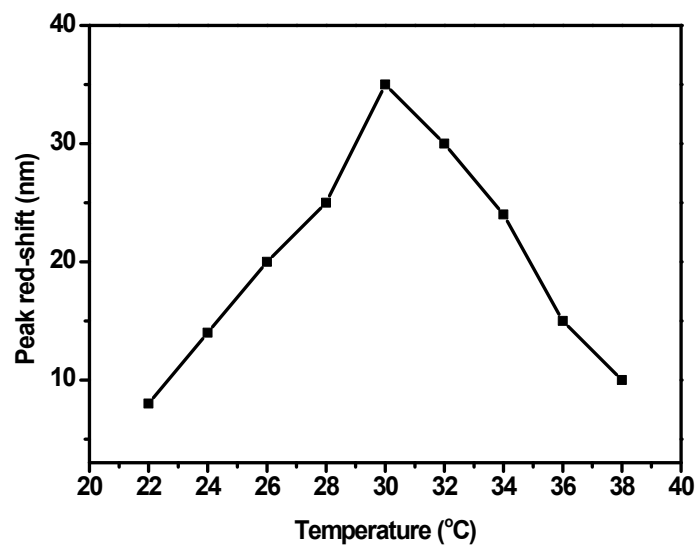

**Figure S4.**  $\lambda_5$  peak red-shift of MG-25% etalon as a function of temperature after exposure to  $\text{CO}_2$ . Peak red-shift was calculated by  $\lambda_5$  (after exposure to  $\text{CO}_2$ ) -  $\lambda_5$  (before exposure to  $\text{CO}_2$ ).

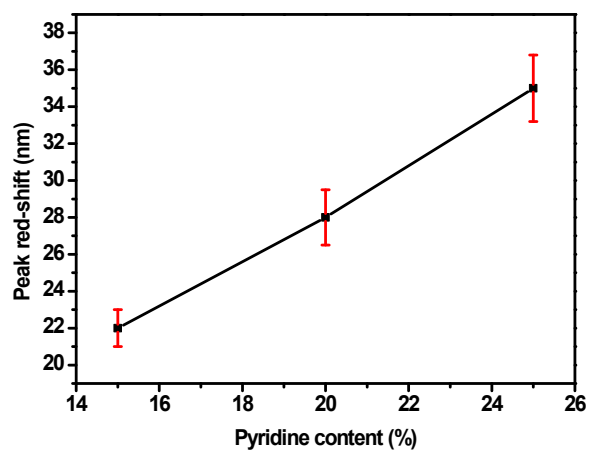

**Figure S5.**  $\lambda_5$  peak red-shift as a function of pyridine content after exposure to  $\text{CO}_2$ . Peak red-shift was calculated by  $\lambda_5$  (after exposure to  $\text{CO}_2$ ) -  $\lambda_5$  (before exposure to  $\text{CO}_2$ ).



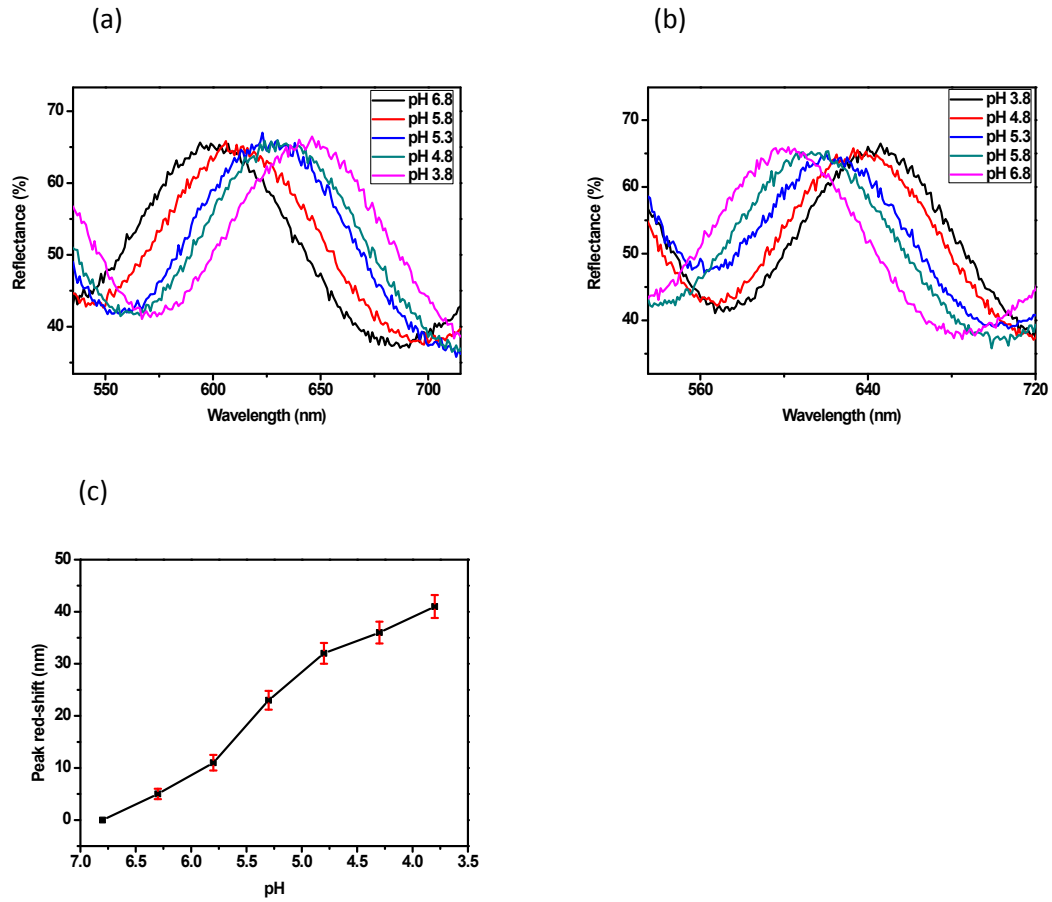

**Figure S6.** (a) Reflectance spectra ( $\lambda_5$ ) for a MG-25% etalon with pH from 6.8 to 3.8; (b) Reflectance spectra ( $\lambda_5$ ) for a MG-25% etalon with pH from 3.8 to 6.8 at 30 °C; (c)  $\lambda_5$  peak red-shift of MG-25% as a function of pH at 30 °C, it was calculated by  $\lambda_5$  (pH) -  $\lambda_5$  (pH = 6.8).

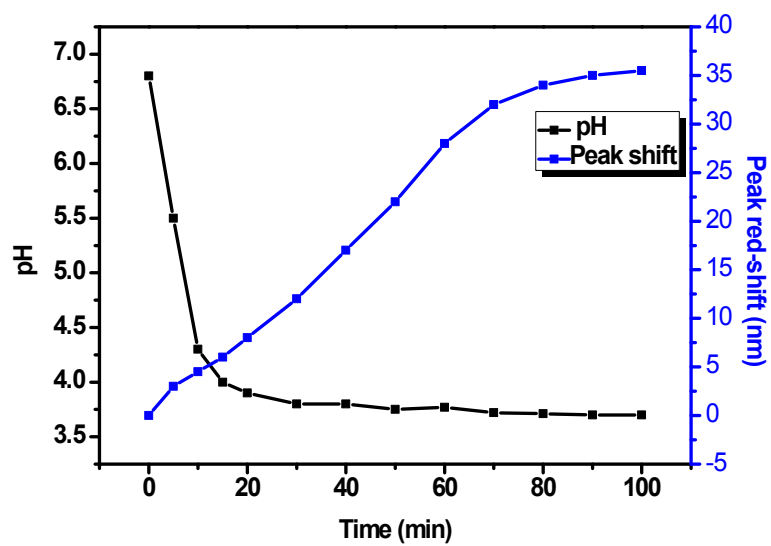

**Figure S7.**  $\lambda_5$  Peak red-shift and pH of MG-25% etalon as a function of time after exposure to  $\text{CO}_2$  at 30 °C, it was calculated by  $\lambda_5(\text{time}) - \lambda_5(\text{time} = 0)$ .
